# Supplementary material for: The TWIST1-centered competing endogenous RNA network promotes proliferation, invasion, and migration of lung adenocarcinoma
Source: PubMed Central journal article supplement (PMC6811597; doi:10.1038/s41389-019-0167-6), 2019-10-23

Supplementary table

Table S1. The primers of shRNA.

| Gene      | Primer (5'→3')                                                  |
|-----------|-----------------------------------------------------------------|
| Sh-TWIST1 | TCGAGGTGTCTAAATGCATTCATATTTCAAGAGAAATATGAATGCATTTAGACACTTTTTG C |
| Sh-SLC12A | GATCGGCAGCACAACACTGTGCTTGTTCATCAAGAGACAAGCACAGTGTGTGCTGCTTTTTC  |
| Sh-ZFH4   | CCGGCGGACAGTTCTTGCCATACTTCTCGAG-AAGTATGGCAAGAAGTGTCCGTTTTT      |

Table S2. Sequence synthesized for the luciferase reporter assay

| Purpose                      | Primer (5'→3')                                                                                                                                                                                                                                                        |
|------------------------------|-----------------------------------------------------------------------------------------------------------------------------------------------------------------------------------------------------------------------------------------------------------------------|
| ZFH4 UTR-pcDNA3.1(+)-WT      | UAACAUUUUUGUUUUGCUUGCCAUGAAUUUCAACUCCACCACCCA<br>GUGAAUUGAUUUUAAAUUGCUAUGCUUUGCUGUUUUUCUGUUGCU<br>GUGGAACUAAAAGAAUGUGAAAGCUGUCAAAAGGGUAUUUUACGAAU<br>CACUUUUGUGUUUGAUUAGUAAAACAAUGUGAUUCAUCCAAAGU<br>AACAGAAGGUUAAUUGUAAGAAAGUAAAAGGCUUGUGAACAAAGAA<br>AGCUAAG        |
| ZFH4 UTR-psiCHECK-2-WT       | UAACAUUUUUGUUUUGCUUGCCAUGAAUUUCAACUCCACCACCCA<br>GUGAAUUGAUUUUAAAUUGCUAUGCUUUGCUGUUUUUCUGUUGCU<br>GUGGAACUAAAAGAAUGUGAAAGCUGUCAAAAGGGUAUUUUACGAAU<br>CACUUUUGUGUUUGAUUAGUAAAACAAUGUGAUUCAUCCAAAGU<br>AACAGAAGGUUAAUUGUAAGAAAGUAAAAGGCUUGUGAACAAAGAA<br>AGCUAAG        |
| TWIST1-514a-3p-psiCHECK-2-WT | UCAUGGGGAGUCUCCUUGUUCACUAGCUUGGUCUGACUAAUUGAUA<br>UUUCAGAUUUCUUAAGGUACACCAGGAUGGAGCUGGCCAUGACUGC<br>UGAGAAGGUAAUUGUUAUCUUAACUCUGGAUAUAAGAACUAGAUGU<br>GUCAAAAGAAAGGUAGCUCUCCAUUUGCCUUUCUUUUUUUUUUUUUU<br>UUUUUUAAUGUGUUUUGCUUUUUCUACUUUUUUUCAUAAGGGGAAAC<br>ACUUUGGA  |
| TWIST1-194-3p-psiCHECK-2-WT  | UCUGCAUUCUGAUAGAAGUCUGAACAGUUGUUUGUGUUUUUUUUUU<br>UUUUUUUUUUGACGAAGAAUGUUUUUAAUUUUUAAUUUUUUUCAUGCA<br>UGCAUUCUCAAGAGGUCGUGCCAAUCAGCCACUGAAGGAAAGGCA<br>UCACUAUGGACUUUCUCUAAUUUUAAAUGGUAACAAUCAGAGGAAC<br>UAUAAGAACACCUUAGAAAUAUUUUUUACUGGGAUCAAACUGGCCU<br>GCAAAACCAU |
| TWIST1-UTR-pcDNA3.1(+)-WT    | GUCGUGCCAAUCAGCCACUGAAGGAAAGGCAUCACUAUGGACUUU<br>CUCUAAUUUUAAAUGGUAACAAUCAGAGGAACUAUAAGAACACCUU<br>UAGAAAUAUUUUUUACUGGGAUCAAACUGGCCUGCAAACCAUAGUC                                                                                                                     |

---

AGUUAUUCUUUUUUUCAUCCUCCUCUGAGGGGAAAAACAAAAA  
AAACUAAAAUACAAAAACAACAUUCUAUUUAUUUAUUGAGGACC  
CAUGGUA AAAAUGCAAUAGAUCGGUGUCUAAAUGCAUUCAUUUU  
UUAUGAUUGUUUGUAAAUAUCUUUGUAUAUUUUUCUGCAAUAAU  
AAAUUA AAAAAUUUAGAGAACCUUAGAGUUUGGUCUAUAUUUUUA  
AAACUAAAGAUUAAGUUGGUGGUA AAUACCUGCUUGUUUAAUUCUA  
GAGGCACCCAGGAGGGAGGGGCACUAAUAUAAACAAAGCAAUGAA  
AAACUCAAUAAAGCAGCUACUGACAGGCACAAGCAUGUUAUUUUUA  
AAAGACAGCUUUAUUAUUAUUCAGUUUGGUAUUCAGAGGGCUUAG  
UAGCAUCUCUUCAUUCUCUACUGUCUCCAACAGCAAAAACUUAAC  
AAAUUUGCUAUUCACCUCUUUUUAUUUUGAGGUGAUAGUUGUUA  
AACAGUUAAAUGCAAUAAGGAGUAUAAAACCGUCACUAUUCUCUU  
AUUAUGUACUUUUUGUCAUGCUCUUCACUCUUUGUGAAGAUUCCUA  
AAUAACAGGUUCUUUCAGUGAAAACAUUAUAGUGUUAUGAAAAU  
UAUCUAUACACAUAUAGAAAUGACCAGAAAUGCAUAGAAAAUAAAG  
UGUAAAUCAGCAGAAAAGAGAAAUCCAUUUGUAAUUUUGCUU AAC  
UCUUCUCUCAUGAAUGAAU AUGACGUUUAUGUGUCAUGUUUGCUAAA  
AAGAAAAGUUAUAUAUCGCUAUUAUGACGCUAUUUGGGAAGCAUC  
AUUCUUUUUUUAUGUGUAAAGAAUAUAAGGCUGUGGAAUAAUAUAC  
AAAAAUGAAGAUCUGAACUUUCAGUAUCCUUGGUAACUGGAUAUA  
AUCACAGUUGGAAUAAUCACAGUUUUAAAUAUCUACAGCUAUGCAGU  
UACUAGUCAGUUCAUUAGCGUUAUAUUUUUAUCCAGAAUACACAGA  
AUUUUUCUGGUGAGAUCAUACAACACACACACAUCUGAAG  
UUAAGUAAAACAUAUUGGGCAAACGGGGGUGUUUGAUUUUUUAUU  
UCAUUCUGAUUAUUUGUGGGCCAGGAACAUAUCUGGCUUUUAUAAUU  
ACAUAUAUAGAAUAGUGAUUUUGUAUCAGUUCUUAAGCUUUUACA  
UCCGAUUUACUGCAUCCAAGUGUAACUGGGGAAGCUUCAAACUGG  
AAAUCAUUUUGGUGCCUGUUCAAACA AUGACUAAUAAGUGUAUG  
UAUCCAAACAGAUUCGUUUUUGCUUAGCUCAGGUCAAAGUUAUUUUUA  
UUGCCUGAAGGUUUUUGUUUUCUUCUUCACACAGCACCAUAGAAUG  
CUGACAUAAAGAAUUAUUGAAUUUAUUGUAAUAUUUCAGACUAUA  
UUUUACAUAAGGAGUCUGCAGCAUUGACUUGUAUUAAAAGGUUAG  
UGAAAGCUUGGAGAAGUAUUAUUAUUUUUUUAUUUUGAUAGUCCUU  
UAGCAAUAACAGAAAGGGAAGGCGAUUAUGUGUUGGUGUAUUUGU  
UGGGGGUGUGUGUGUGUUGUGUGUAAGGCAGGUUAGAAAUGUAAGG  
AGGGUGCCCUAGGAGGAUGAGGGAAAGCAUUAGGUUGGUAUUUCUU  
UUUUGUAUGUAUCAUCCAACCACCUCAUUUUCUAAAUAUUCU AUG  
GGGAGUCUCCUUGUUCACUAGCUUGGUCUGACUAUUUGAUUUUCA  
GAUUUCUUAAGGUACACCAGGAUGGAGCUGGCCAUGACUGCUGAGA  
AGGUAAUUGUUAUCUUAACUCUGGAUAUAAGAACUAGAUGUGUCA  
AGAAAGGUAGCUCUCCAUUUGCCUUUCUUUUUAUUUCUUCUUUUUU  
UAAUGUGUUUUGCUUUUUCUACUUUUUCAUAAGGGGA  
UCGCUGGGGAGCAGGCGUCUCUCCUCAGUCGGCUUGUCGCCUGCUCC  
CCGUAUCCCAUGGCUCUCCGCCAAAGACUGAAAUUGUGGAGCUGGA

SLC12A5 UTR-  
pcDNA3.1(+)-

|                                   |                                                                                                                                                                                                                                                                                                                                                                                                                                                                                                                                                                                                                                                                                                                                                                                                                                                                                                                |
|-----------------------------------|----------------------------------------------------------------------------------------------------------------------------------------------------------------------------------------------------------------------------------------------------------------------------------------------------------------------------------------------------------------------------------------------------------------------------------------------------------------------------------------------------------------------------------------------------------------------------------------------------------------------------------------------------------------------------------------------------------------------------------------------------------------------------------------------------------------------------------------------------------------------------------------------------------------|
| WT                                | GGGCGCCCCUCCCCGGAGUUUCCUCCCUGGGACAAGUGAGGGAGGA<br>GGGGGCCGAUUCUGGUUUAGGGGCCGGACCCACUGAGAGGCCCCAG<br>AGCCGCCCUGAUGUUCUCCCCGUCCCCAUCUGGCAGCUCCUGUC<br>UCGCCUGAGGGACCCAGCCGCCUUCUCCGUGCUCUGGGGCCGGGCCU<br>CGCUGCUUAGCAGCGGCCUCUAGCUCCGUCUCCGGGGACCUGGGCC<br>UGAGGGAGGGCUGGAGUCGCACGCGCUUUGUCCUAGCGCCUGUCU<br>GCUCUCCUCUAAACUAGGACCCAGGGCCUUGGCUUCCCCAGCUCAUC<br>CUUGGCCCUUCCGCUCCACCAGCCUGGUCUGAGGCGUGCUCUGUCCU<br>UAGAGAAGGCGCGGUGGCCGGGUUCCCUUCCCCUAGGGCACAUUAC<br>UAAGGGGGUCAGGCACUGCAUGCUCGUUCCAGCACCAUCUGGGACU<br>GGGUACAGUACCUCAGCCCCAGGGCCUGACCUGCGCACCUAGCUU<br>GACAUCUCACGCACCUCUCCAGAGCUGGCGCCACUGAUAUCCGGAC<br>CUCACCACCUCUUUCCUUGAGCCCAAGGCAGAGCUGGAGCUGGCG<br>CCACCCAGACAGCGUCAGGUGUGGCUGGGGUAGGUUUGGAGGUCUG<br>CCAGUUACACCAAGUCCCCUCUGAGAUUCGAUCAGGGGACUGGAUA<br>GAUUCUUUCAGGUACUCAUUCAGGAAGCU                                                                                                      |
| SLC12A5 UTR-<br>psiCHECK-2-<br>WT | UCGCUGGGGAGCAGGCGUCUCUCCUCAGUCGGCUUGUCGCCUGCUCC<br>CCGUAUCCCAUGGCUCUCCGCCAAAGACUGAAAUUGUGGAGCUGGA<br>GGGCGCCCCUCCCCGGAGUUUCCUCCCUGGGACAAGUGAGGGAGGA<br>GGGGGCCGAUUCUGGUUUAGGGGCCGGACCCACUGAGAGGCCCCAG<br>AGCCGCCCUGAUGUUCUCCCCGUCCCCAUCUGGCAGCUCCUGUC<br>UCGCCUGAGGGACCCAGCCGCCUUCUCCGUGCUCUGGGGCCGGGCCU<br>CGCUGCUUAGCAGCGGCCUCUAGCUCCGUCUCCGGGGACCUGGGCC<br>UGAGGGAGGGCUGGAGUCGCACGCGCUUUGUCCUAGCGCCUGUCU<br>GCUCUCCUCUAAACUAGGACCCAGGGCCUUGGCUUCCCCAGCUCAUC<br>CUUGGCCCUUCCGCUCCACCAGCCUGGUCUGAGGCGUGCUCUGUCCU<br>UAGAGAAGGCGCGGUGGCCGGGUUCCCUUCCCCUAGGGCACAUUAC<br>UAAGGGGGUCAGGCACUGCAUGCUCGUUCCAGCACCAUCUGGGACU<br>GGGUACAGUACCUCAGCCCCAGGGCCUGACCUGCGCACCUAGCUU<br>GACAUCUCACGCACCUCUCCAGAGCUGGCGCCACUGAUAUCCGGAC<br>CUCACCACCUCUUUCCUUGAGCCCAAGGCAGAGCUGGAGCUGGCG<br>CCACCCAGACAGCGUCAGGUGUGGCUGGGGUAGGUUUGGAGGUCUG<br>CCAGUUACACCAAGUCCCCUCUGAGAUUCGAUCAGGGGACUGGAUA<br>GAUUCUUUCAGGUACUCAUUCAGGAAGCU |

The labeled red nucleotides were changed into its complementary nucleotides in the mutant cohort.

**Table S3. The primers of RT-PCR.**

| Gene                    | Primer (5'→3')        |
|-------------------------|-----------------------|
| TWIST1-mRNA-F           | GGACAAGCTGAGCAAGATTCA |
| TWIST1-mRNA-R           | CGGAGAAGGCGTAGCTGAG   |
| TWIST1-3'UTR specific-F | AGCCACTGAAAGGAAAGGCAT |

|                          |                           |
|--------------------------|---------------------------|
| TWIST1-3'UTR specific-R  | AGCAGGTATTTACCACCAACTTA   |
| ZFHX4-mRNA-F             | GGAGAACTGTGGGCAGAGAG      |
| ZFHX4-mRNA-R             | TCTCTGCTCCTCCTGTTC        |
| ZFHX4-3'UTR specific-F   | CAACTTCCACCACCCAGTGA      |
| ZFHX4-3'UTR specific-R   | ACCTTCTGTTACTTTGGAATGAATC |
| SLC12A5-mRNA-F           | GCAGGAGCCATGTACATCCT      |
| SLC12A5-mRNA-R           | CCATGCAGGTGAGCACACA       |
| SLC12A5-3'UTR specific-F | CTCTCCTCAGTCGGCTTGTC      |
| SLC12A5-3'UTR specific-F | GGCCCTGGGTCCTAGTTAGA      |

---

**Table S4. Clinicopathologic parameters and expression of TWIST1/SLC12A5/ZFHX4 in 92 of LUAD patients**

| Variable                     | Cases(n) | %    |
|------------------------------|----------|------|
| <b>Ages</b>                  |          |      |
| <60                          | 51       | 55.4 |
| ≥60                          | 41       | 44.6 |
| <b>Sex</b>                   |          |      |
| Male                         | 67       | 72.8 |
| Female                       | 25       |      |
| <b>Degree of differation</b> |          |      |
| Well                         | 25       | 27.2 |
| Moderate                     | 20       | 21.7 |
| Poor                         | 47       | 51.1 |
| <b>Tumor size</b>            |          |      |
| ≤3cm                         | 34       | 37.0 |
| >3cm                         | 58       | 63.0 |
| <b>Lymph node metastasis</b> |          |      |
| No                           | 50       | 54.3 |
| Yes                          | 42       | 45.6 |
| <b>Pleural invasion</b>      |          |      |
| No                           | 67       | 72.8 |
| Yes                          | 25       | 34.7 |
| <b>TNM staging</b>           |          |      |
| I                            | 34       | 37.0 |
| II                           | 25       | 26.9 |
| III                          | 33       | 35.9 |
| <b>TWIST1 expression</b>     |          |      |
| High                         | 71       | 77.2 |
| Low                          | 21       | 22.8 |
| <b>SLC12A5 expression</b>    |          |      |
| High                         | 61       | 66.3 |
| Low                          | 31       | 33.7 |
| <b>ZFHX4 expression</b>      |          |      |
| High                         | 63       | 68.5 |
| Low                          | 29       | 31.5 |

Expression of TWIST/SLC12A4/ZFHX4 was normalized to paired normal tissue. High expression was defined as tumor/non-tumor>1.

### Supplementary figures

Figure S1. Expression profile of TWIST1 in LUAD cancer cell lines by RT-PCR analysis

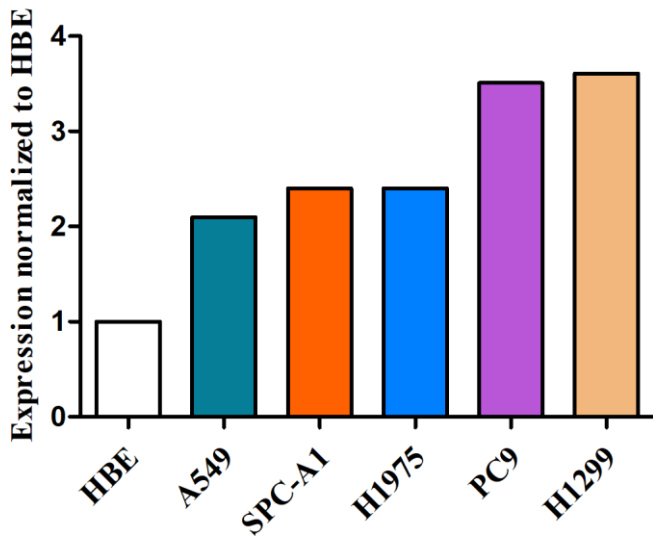

Figure S2. Overexpression of specific 3'UTR regions confirmed by q-PCR

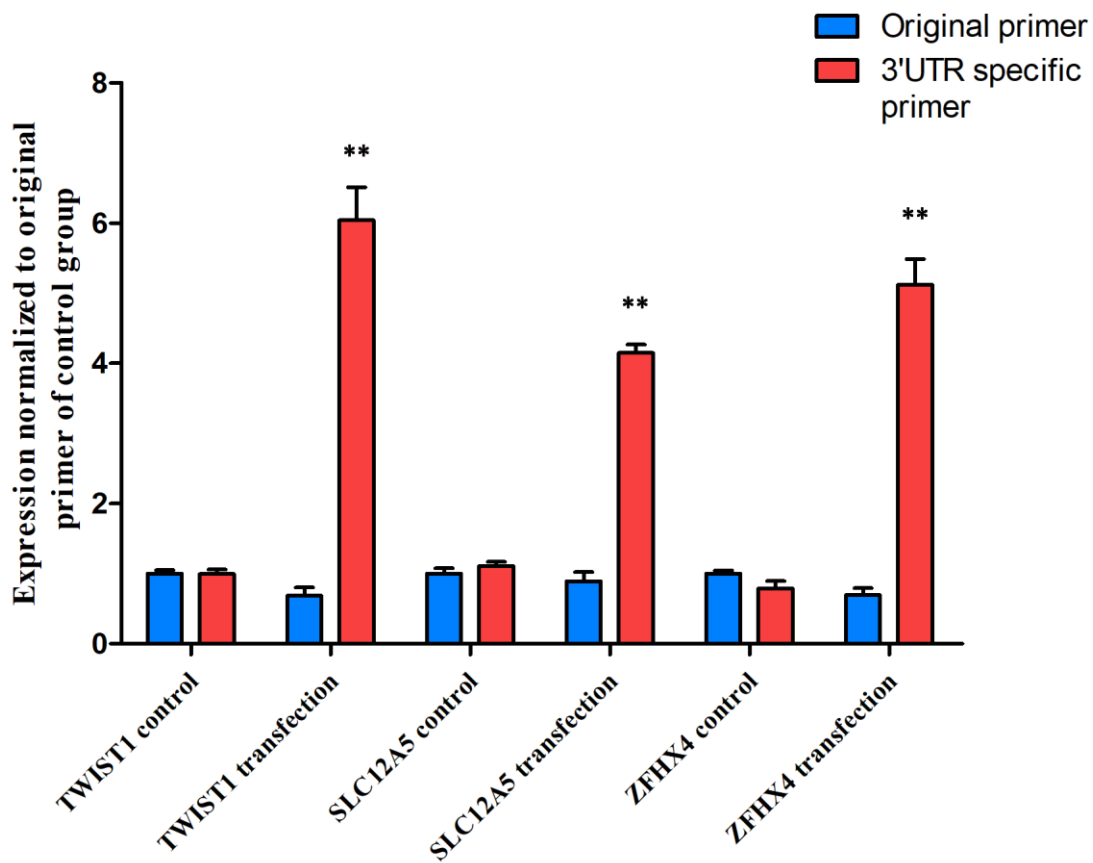

**Figure S3.** Biological functions of the cDNAs of TWIST1 ceRNET in A549. (A-B) Effects of TWIST1-ceRNET cDNA on proliferative capacity evaluated by 5-ethynyl-2'-deoxyuridine (EdU) proliferation assay (A) and Cell Counting Kit-8 (CCK-8) assay (B). (C) Effects of TWIST1-ceRNET cDNA on migration and invasion capacity evaluated by transwell assay and matrigel assay All data are mean  $\pm$  s.d. The data statistical significances were assessed by Student's t-test compared to the NC group. \*P < 0.05, \*\*P < 0.001.

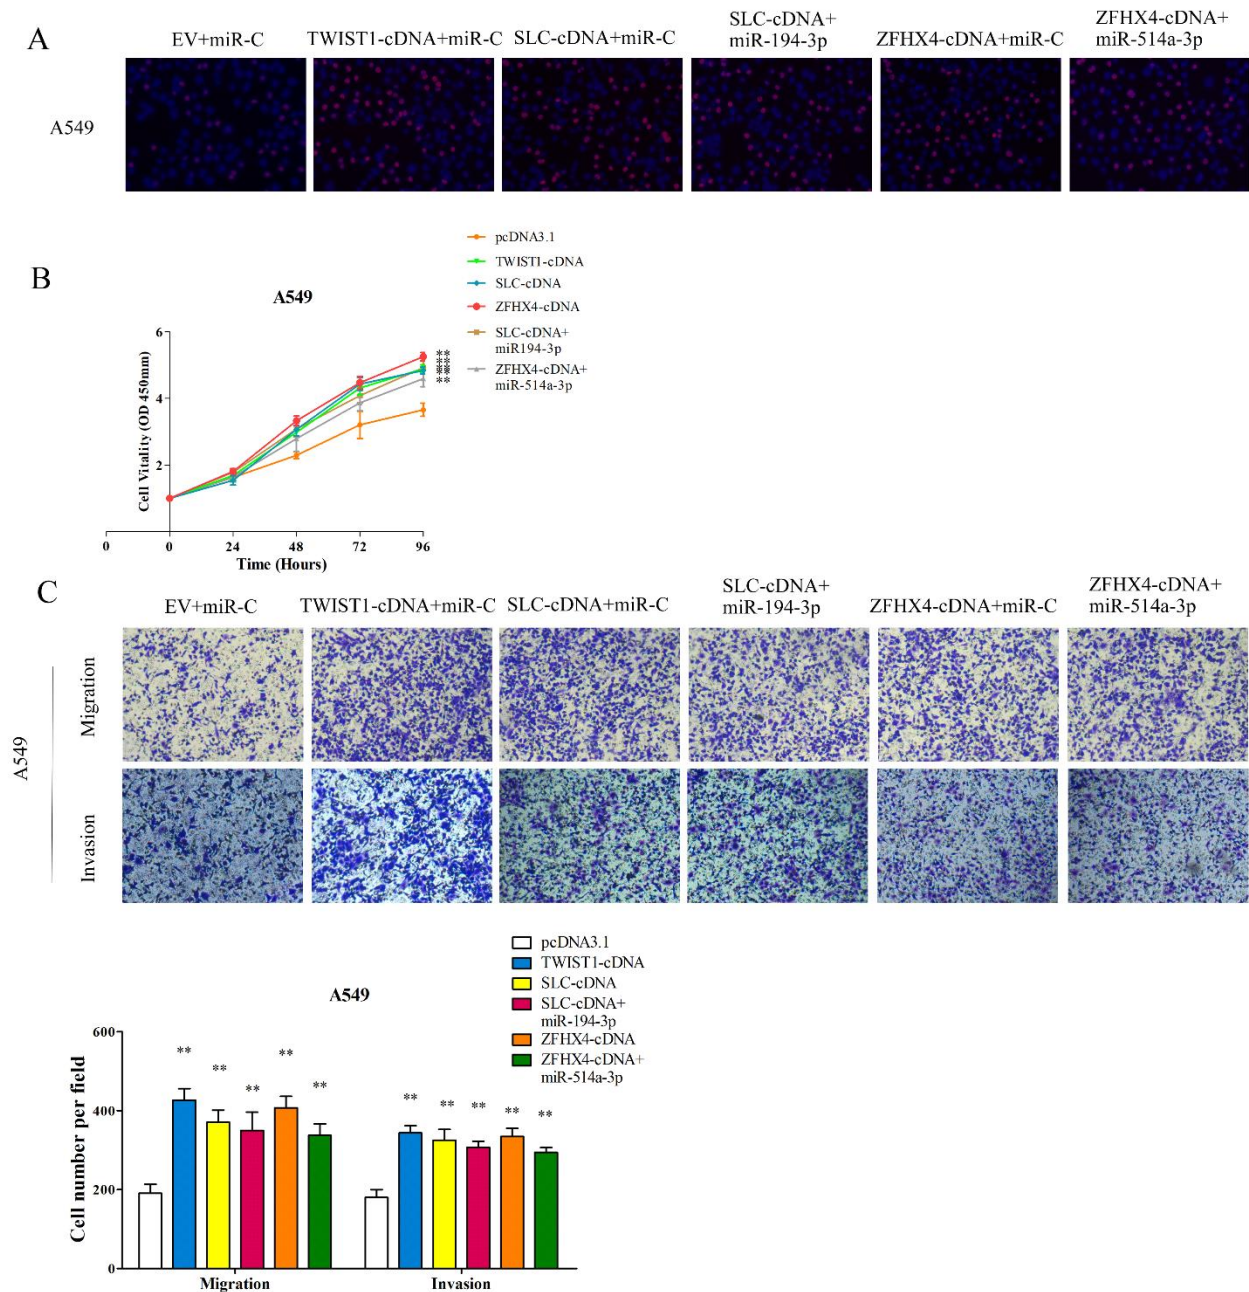

**Figure S4.** Q-PCR results of the RIP based on Ago2 showed that SLC12A5 and ZFHX4 can compete with the TWIST1 transcript for the binding of miRNAs in H1299 cells

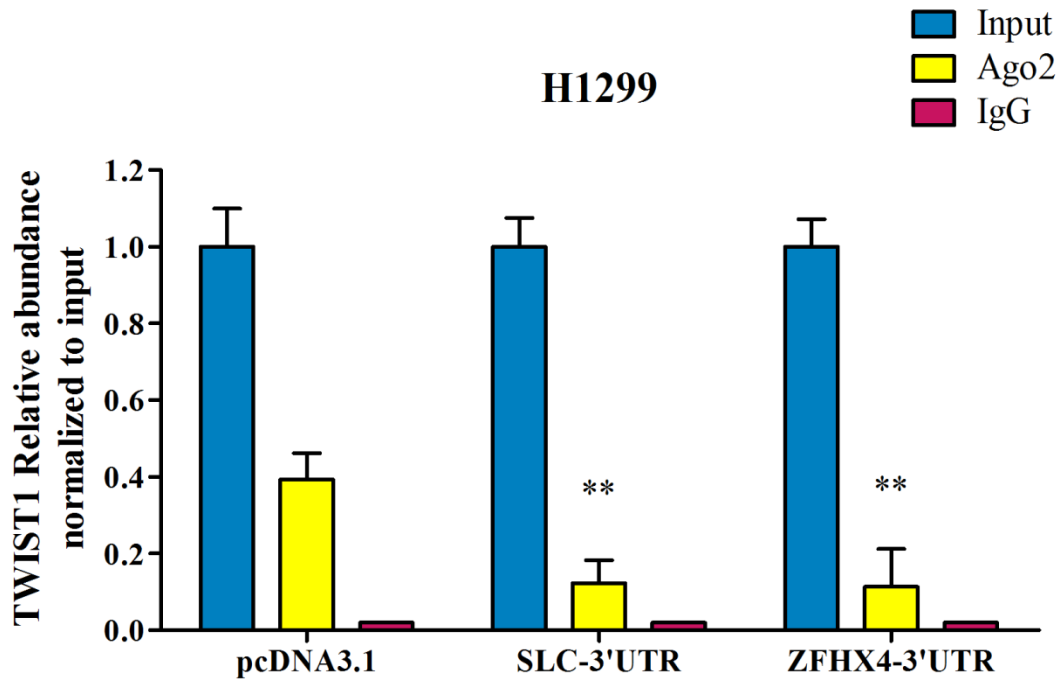

**Figure S5.** Q-PCR results of the RIP based on Ago2 showed that SLC12A5 and ZFHX4 can compete with the TWIST1 transcript for the binding of miRNAs in A549 cells

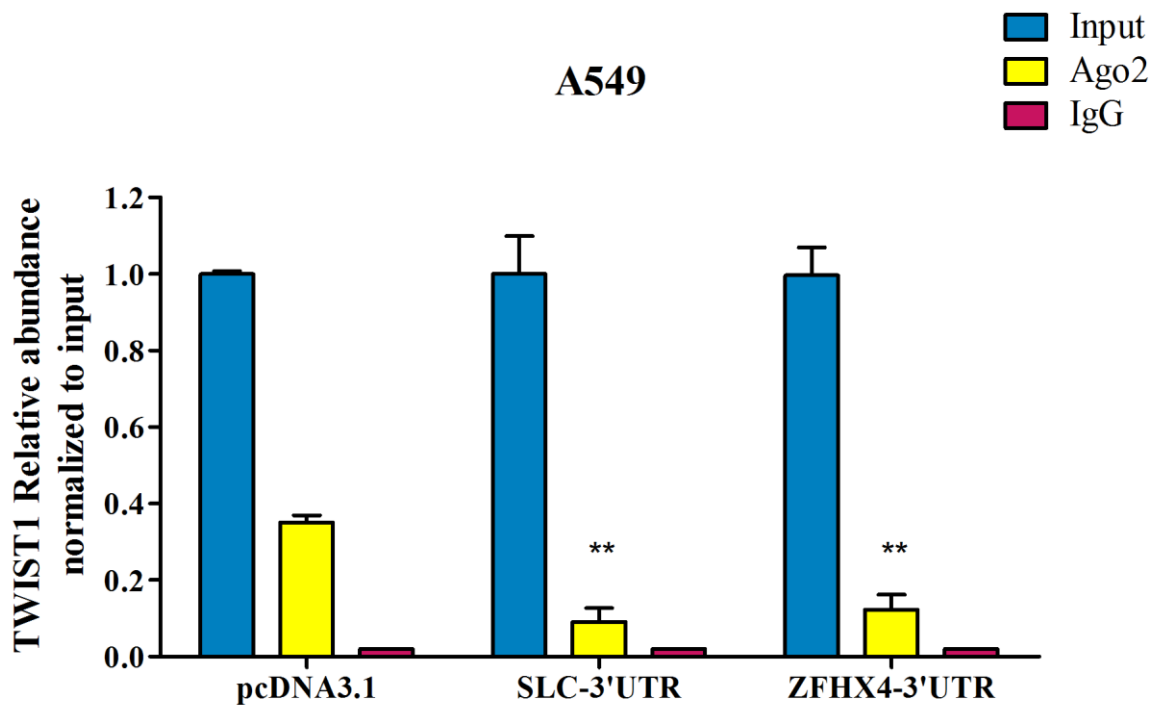

Supplement: 41389_2019_167_MOESM1_ESM.pdf [file 41389_2019_167_MOESM1_ESM.pdf]
